1 Auditory spatial analysis in reverberant audio-visual multi-talker  
2 environments with congruent and incongruent visual room information

3

4 Axel Ahrens

5 Hearing Systems Section, Department of Health Technology, Technical University of Denmark,

6 2800 Kgs. Lyngby, Denmark

7 [aahr@dtu.dk](mailto:aahr@dtu.dk)

8

9 Kasper Duemose Lund

10 Hearing Systems Section, Department of Health Technology, Technical University of Denmark,

11 2800 Kgs. Lyngby, Denmark

12 [kasperduemose@gmail.com](mailto:kasperduemose@gmail.com)

13

14

15

16

17

18

19

20 Date: 13 February 2022

21

22 Running Title: Auditory scene analysis

## 23 Abstract

24 In multi-talker situation, listeners have the challenge to identify a target speech source out of a  
25 mixture of interfering background noises. In the current study it was investigate how listeners  
26 analyze audio-visual scenes with varying complexity in terms of number of talkers and  
27 reverberation. Furthermore, the visual information of the room was either coherent with the  
28 acoustic room or incoherent. The listeners' task was to locate an ongoing speech source in a  
29 mixture of other speech sources. The 3D audio-visual scenarios were presented using a  
30 loudspeaker array and virtual reality glasses. It was shown that room reverberation as well as the  
31 number of talkers in a scene influence the ability to analyze an auditory scene in terms of accuracy  
32 and response time. Incongruent visual information of the room did not affect this ability. When  
33 few talkers were presented simultaneously, listeners were able to quickly and accurately detect a  
34 target talker even in adverse room acoustical conditions. Reverberation started to affect the  
35 response time when four or more talkers were presented. The number of talkers became a  
36 significant factor for five or more simultaneous talkers.

37

38 Keywords: Speech perception; Virtual Reality; Localization

39

## 40 I. Introduction

41 The human auditory system has the ability to focus on a speech stream in the presence of  
42 interfering speech stimuli. Such a multi-talker scenario has been termed the cocktail-party situation  
43 (Bronkhorst, 2000; Cherry, 1953). Many factors are known to reduce the ability to understand  
44 speech in such a cocktail-party situation, e.g., the level of the target speech relative to the  
45 interferers, the number of talkers, or the type of listening room. These effects are commonly  
46 measured by asking the listeners to repeat a word or a sentence or to write down the perceived  
47 stimulus. However, in our daily life the task in a cocktail-party situation is usually different, where  
48 it is necessary to follow a conversation and to identify a certain topic or continuous speech stream  
49 out of an interfering speech mixture. In the current study we investigated the ability of listeners to  
50 analyze an acoustic scene with varying complexity in terms of number of interfering talkers, room  
51 reverberation and coherency of visual room information.

52 The number of interfering talkers has been shown to influence the intelligibility of a target talker.  
53 (S. A. Simpson & Cooke, 2005) showed that the intelligibility decreases when increasing the  
54 number of interfering speech sources for up to eight interfering talkers, as the ability to listen into  
55 speech gaps is reduced and at the same time the interfering speech remains intelligible and can be  
56 confused with the target speech. When further increasing the number of interfering talkers, the  
57 intelligibility was shown to improve as the interferers become more noise-like and therefore do  
58 not contain understandable speech.

59 Reflections and reverberation are present in nearly all communication scenarios. Room  
60 reverberation has been shown to negatively affect speech perception in a number of studies (Best  
61 et al., 2015; Bronkhorst & Plomp, 1990; Moncur & Dirks, 1967; Nabelek & Mason, 1981; Nábělek  
62 & Pickett, 1974). Particularly, the diffuse reverberation, i.e., the late reverberant tail, has been  
63 shown to reduce speech intelligibility, while early reflections do not seem to harm, or might even

64 improve speech perception (Arweiler et al., 2013; Arweiler & Buchholz, 2011; Warzybok et al.,  
65 2013).

66 Previous studies have investigated the ability of listeners to identify and locate speech in the  
67 presence of other speech sources. (Kopčo et al., 2010) measured the localization accuracy of a  
68 digit spoken by a female talker in the presence of words spoken by male interfering talkers. The  
69 target and the interferers were all presented in the frontal area of the listener. They found that the  
70 presence of the interferers reduced the localization accuracy. (Buchholz & Best, 2020) measured  
71 localization accuracy with a similar target digit as in (Kopčo et al., 2010) but with a more realistic  
72 background noise scene. The interfering signals were seven paired conversations (both male and  
73 female) at various locations in a simulated cafeteria. Results showed that the localization accuracy  
74 was only affected by the noise when the target source was distant but not when it was nearby. This  
75 finding suggests an interaction with reverberation, as farther sources have more reverberant energy  
76 relative to the direct sound compared to nearby sources.

77 While these studies focused on the ability to locate a speech signal in a speech background,  
78 (Hawley et al., 1999) investigated both the localization accuracy of speech as well as the  
79 intelligibility. They showed that the inability to correctly locate a source did not limit the ability  
80 to correctly understand it. However, the number of interfering sources was limited to three.

81 (Weller et al., 2016) presented a novel method to evaluate the ability to analyze a complex acoustic  
82 scene. They asked their listeners to judge the location of all talkers presented in a virtual cocktail-  
83 party situation by indicating the gender of the talkers. When varying the number of simultaneously  
84 presented talkers, they found that normal-hearing listeners were able to correctly locate and count  
85 the number of talkers for up to four sources. When six talkers were presented, the accuracy  
86 decreased.

87 Most of the beforementioned studies focused on the ability to localize speech but less to  
88 comprehend the speech. However, in a real-world cocktail party, listeners need to perform both  
89 tasks to successfully communicate. In the current study, we asked listeners to locate a talker  
90 speaking about a certain topic, while presenting a varying number of other simultaneous talkers.  
91 Thus, the primary task was to understand the speech and the secondary task to locate the talker.  
92 The experiment was conducted in an audio-visual virtual environment using a loudspeaker array  
93 and virtual reality glasses. The listeners' task was to indicate a semi-transparent avatar at the  
94 location of an acoustic source talking about a topic indicated by an icon. The sources were located  
95 at one of fifteen possible locations with 15° horizontal separation. The number of simultaneous  
96 speech sources was varied between two and eight. Three virtual rooms were simulated visually  
97 and acoustically. Furthermore, a condition with incongruent audio-visual cues was presented by  
98 visually showing the anechoic room and acoustically presenting the reverberant room or vice  
99 versa.

100

## 101 II. Methods

102

### 103 A. Participants

104

105 Thirteen Danish native speaking normal-hearing listeners aged 20-26 years participated in the  
106 experiment (7 female and 6 male). Participants were paid on an hourly basis and gave consent to  
107 an ethics agreement approved by the Science-Ethics Committee for the Capital Region of Denmark  
108 (reference H-16036391).

109

## 110 B. Material

111  
112 The speech material for target and interferers was taken from a database of anechoically recorded  
113 monologues in Danish (see (Lund et al., 2019) for details<sup>1</sup>). Each monologue was designed with  
114 characteristic features in mind, ensuring significant difference of the content. The database consists  
115 of ten monologues each spoken by ten native Danish speakers.

116

## 117 C. Audio-visual rooms

118  
119 Three different acoustic and visual rooms were used in this study, a high-reverberant room, a mid-  
120 reverberant room and an anechoic room. The dimensions of all three rooms remained constant as  
121 shown in Figure 1, both acoustically and visually. However, the surface materials differed.

122

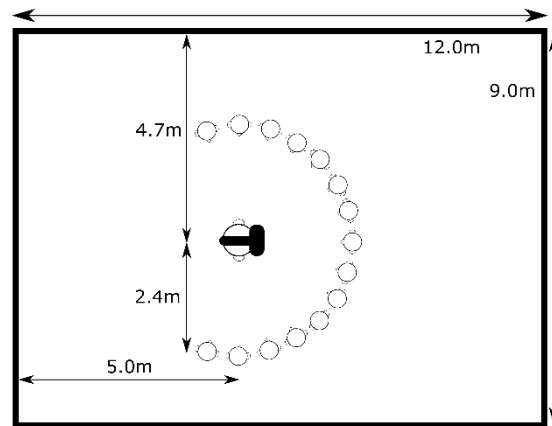

124 Figure 1: Top view of the virtual audio-visual room. The listener is wearing VR glasses with a  
125 visual simulation of the room including 15 potential talker positions at 2.4m distance in the frontal  
126 hemisphere visualized by the head icons. The height of the room is 2.8m.

<sup>1</sup> Data available: [https://data.dtu.dk/articles/Recordings\\_of\\_Danish\\_Monologues\\_for\\_Hearing\\_Research/9746285](https://data.dtu.dk/articles/Recordings_of_Danish_Monologues_for_Hearing_Research/9746285)

127

128 Figure 2 shows the visual appearances of the three rooms. Figure 2A shows the anechoic room  
129 with foam wedges as commonly seen in anechoic chambers. For the acoustic reproduction of this  
130 room only the direct sound was reproduced from single loudspeakers. In Figure 2B the mid-  
131 reverberant room can be seen. The visual as well as the acoustical properties were similar to a large  
132 living room. The highly reverberant room is shown in Figure 2C. It was modelled with bare  
133 concrete surfaces to simulate a highly reverberant, yet realistic environment.

134

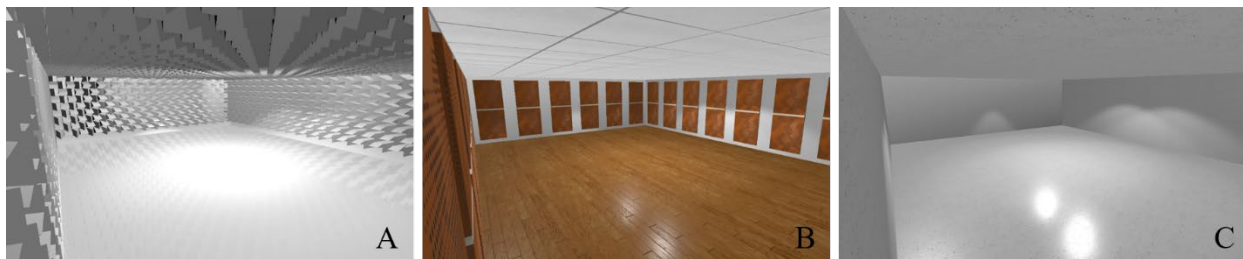

136 Figure 2: Visual appearance of the three virtual rooms. A: anechoic, B: mid-reverberant, C: high-  
137 reverberant. The dimensions in the rooms are identical, while the surface materials differ.

138

139 The rooms were simulated using the room acoustic simulation software Odeon (Odeon A/S, Kgs.  
140 Lyngby, Denmark) with the materials and surface absorption coefficients as shown in Table 1. For  
141 the anechoic room, only the direct sound was considered. In Figure 3 the reverberation time, clarity  
142 and direct-to-reverberant ratio of the three rooms are shown. The reverberation time as well as the  
143 clarity were calculated using the ITA-toolbox (Berzborn et al., 2017), the direct-to-reverberant  
144 ratio was calculated as the ratio between the direct sound and the reflections. Mind that for the  
145 anechoic condition the clarity and direct-to-reverberant ratio are infinite as no reflections are  
146 present which is indicated with arrows.

147

148 Table 1: Absorption coefficients ( $\alpha$ ) of the surfaces in the mid-reverberant and high-reverberant room.

| $\alpha$ (mid-rev/high-rev)       | 63 Hz    | 125 Hz   | 250 Hz    | 500 Hz   | 1 kHz    | 2 kHz     | 4 kHz    | 8 kHz     |
|-----------------------------------|----------|----------|-----------|----------|----------|-----------|----------|-----------|
| Side walls<br>Wooden panels/Brick | 0.2/0.06 | 0.2/0.06 | 0.2/0.06  | 0.3/0.07 | 0.4/0.07 | 0.4/0.07  | 0.5/0.08 | 0.5/0.09  |
| Floor<br>Parquet/Concrete         | 0.2/0.05 | 0.2/0.05 | 0.15/0.05 | 0.1/0.05 | 0.1/0.07 | 0.05/0.07 | 0.1/0.07 | 0.1/0.07  |
| Ceiling<br>Gypsumboard/Concrete   | 0.3/0.05 | 0.3/0.05 | 0.35/0.05 | 0.4/0.05 | 0.4/0.07 | 0.4/0.07  | 0.5/0.07 | 0.55/0.07 |

149

150

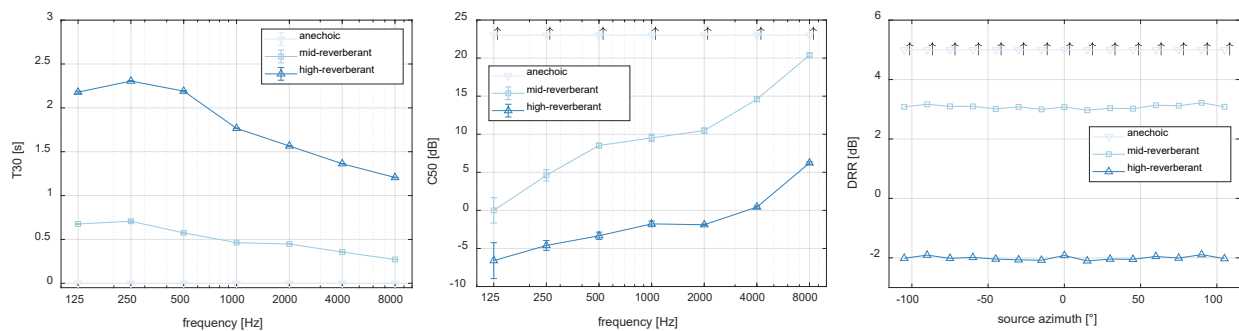

152 Figure 3: Reverberation time (T30), Clarity (C50) and the direct-to-reverberant ratio (DRR) for  
 153 the three rooms. The T30 and the C50 are shown with respect to octave frequency bands. The DRR  
 154 is shown with respect to the source azimuth angle. The arrows indicate that the measure is infinite.

155

## 156 D. Task

157

158 The listeners' task was to identify the location of a talker amongst concurrent talker(s) in a virtual  
 159 audio-visual room according to the story in the monologue. Accuracy and completion time of the  
 160 task was emphasized by advising the listeners to "find the correct story as fast as possible". The  
 161 number of concurrent talkers varied between two and eight, thus the number of interfering talkers  
 162 varied between one and seven. An icon visualizing the target story content was displayed on the  
 163 backwall in the visual virtual room. The 15 possible talker positions were always represented by



164 semi-transparent humanoid shapes independent of the actual number of concurrent talkers. Figure  
165 1 visualizes the possible talker locations between  $-105^\circ$  to  $105^\circ$  separated by  $15^\circ$  in the frontal  
166 hemisphere at a distance of 2.4 m. The task was performed by pointing at the position where the  
167 target talker was perceived. The participants were using a virtual reality controller that included  
168 the visual appearance of a laser pointer in the virtual room.

169 For each scene a unique talker, story and position was randomly chosen as the target. Between one  
170 and seven masking talkers were included in a similar way. No talker, story or position could occur  
171 twice at the same time. For each trial, the acoustic talkers were presented for 120 seconds. The  
172 stories were started at a random point in time and were repeated from the beginning after finishing.  
173 Thus, no bias towards the beginning of each story was introduced. The listener could indicate the  
174 perceived target talker position at any time, even after the audio had stopped. Each individual  
175 talker was presented at a sound pressure level of 55 dB SPL.

176 Three congruent audio-visual rooms were used as described above, an anechoic, a mid-reverberant  
177 and a high-reverberant room. In addition to the conditions with congruent audio and visual room  
178 information, two conditions with incongruent audio-visual cues were considered. These were  
179 anechoic acoustics with the appearance of a highly reverberant room and high-reverberant  
180 acoustics with the visuals of the anechoic room. Thus, five room conditions were tested. Each of  
181 the conditions was repeated three times resulting in 105 trials, five audio-visual conditions and  
182 between two and eight concurrent talkers.

183 Prior to the experiment, the listeners performed a familiarization phase, where they were  
184 familiarized with the speech material and the story content but not with the task itself. The anechoic  
185 version of the ten stories were played back via headphones in a randomized order. Each talker was  
186 randomly assigned to one of the stories. Thus, listeners heard each story and each talker once. For

187 the training, listeners were instructed to focus on unique content features or passages of the stories.  
188 After completed training listeners were seated in the loudspeaker environment and introduced to  
189 the listening task and the interaction method using the VR controller.

190

#### 191 E. Virtual audio-visual setup

192

193 The virtual visual scenes were rendered on the head-mounted display (HMD) of an HTC Vive Pro  
194 Eye (HTC Vive system, HTC Corporation, New Taipei City, Taiwan). This system allowed to  
195 track the listeners motion and record eye gaze and pupil dilation from inside the HMD with a  
196 sampling frequency of up to 120 Hz and an accuracy between  $0.5^\circ$  and  $1.1^\circ$ . The visual virtual  
197 scenes were modeled and displayed using Unity (Unity Technologies, San Francisco, California,  
198 USA).

199 The acoustic scenes were reproduced on 64-channel spherical loudspeaker array housed in an  
200 anechoic chamber (see (Ahrens, Marschall, et al., 2019) for details). The loudspeaker signals were  
201 generated using the room acoustic simulation using the LoRA-toolbox (Favrot & Buchholz, 2010).  
202 For the loudspeaker playback the nearest loudspeaker mapping was applied, where the direct sound  
203 as well as the early reflections are mapped to the nearest loudspeaker. The late reverberant tail is  
204 reproduced using 1<sup>st</sup> order ambisonics to achieve a diffuse acoustic field (Favrot & Buchholz,  
205 2010).

#### 206 F. Outcome measures and statistical analyses

207

208 To evaluate the listeners' ability to successfully analyze a cocktail-party scenario, two outcome  
209 measures were evaluated. First, the ability to correctly identify and locate the target talker. This

210 allows for a binary right/wrong analysis as well as a localization error in degrees. Second, the  
211 response time of the listener from audio onset to decision.

212 The outcome measures were analyzed using an analysis of variance of mixed linear models. The  
213 computational analyses were done using the statistical computing software R(R Core Team, 2020)  
214 and the lmerTest (Kuznetsova et al., 2017) package. Within factor analyses were conducted using  
215 marginal means implemented in the emmeans package (Lenth, 2020) with Tukey correction for  
216 multiple comparisons.

### 217III. Results

218

#### 219 A. Coherent audio-visual room information

220

221 Figure 4 shows the percentage of correctly located stories. Each bar contains 42 datapoints across  
222 the 14 participants and three repetitions. When few talkers are in a scene, the participants were  
223 able to accurately locate the correct story in all reverberation conditions. In scenes with more than  
224 five talkers, the accuracy in the high-reverberant condition (dark blue) decreases. In the mid-  
225 reverberant condition such a decrease can only be observed when eight talkers are in a scene. In  
226 the anechoic condition, the participants were able to accurately locate the target story for all  
227 numbers of talkers.

228

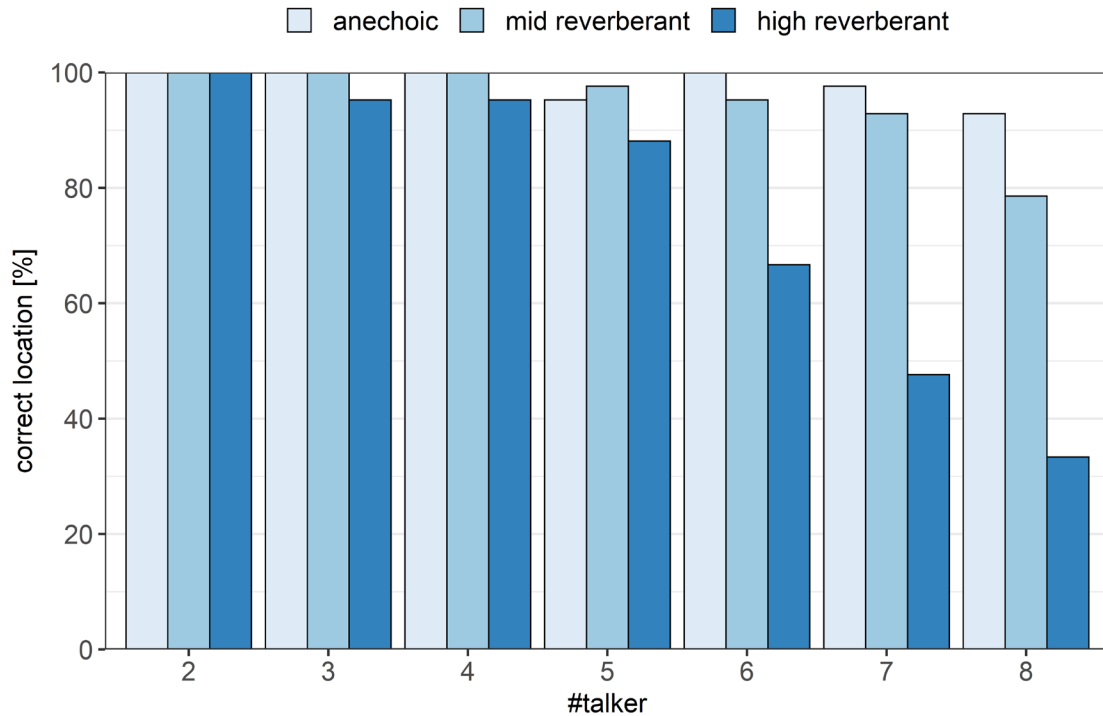

230 Figure 4: The percentage of correct response locations. Each bar contains 42 datapoints across  
231 subjects and repetitions. The three colors indicate the room conditions.

232

233 Figure 5 shows the response time of the correct responses when two to eight talkers were presented  
234 simultaneously. The response time is displayed for the audio-visually coherent room conditions  
235 with varying reverberation times indicated with the different colors. With an increasing number of  
236 simultaneous talkers, the time needed to identify the target talker increased [ $F(6,755.2)=73.1$ ,  
237  $p<0.0001$ ]. The response time was also found to be dependent on the reverberation time  
238 [ $F(2,755.6)=83.1$ ,  $p<0.0001$ ]. Furthermore, the interaction term between the number of talkers and  
239 the reverberation time was found significant [ $F(12,754.8)=5.4$ ,  $p<0.0001$ ]. Specifically, the high-  
240 reverberant condition was found to lead to a higher response time when four or more talkers were  
241 presented [ $p<0.05$ ] but not with less than four talkers [ $p>0.5$ ]. The differences between the high-  
242 reverberant condition and the anechoic/mid-reverberant condition increases with larger numbers

243 of talkers. No significant differences between the anechoic and the mid reverberant condition was  
244 found [ $p > 0.1$ ] across all number of talkers.

245

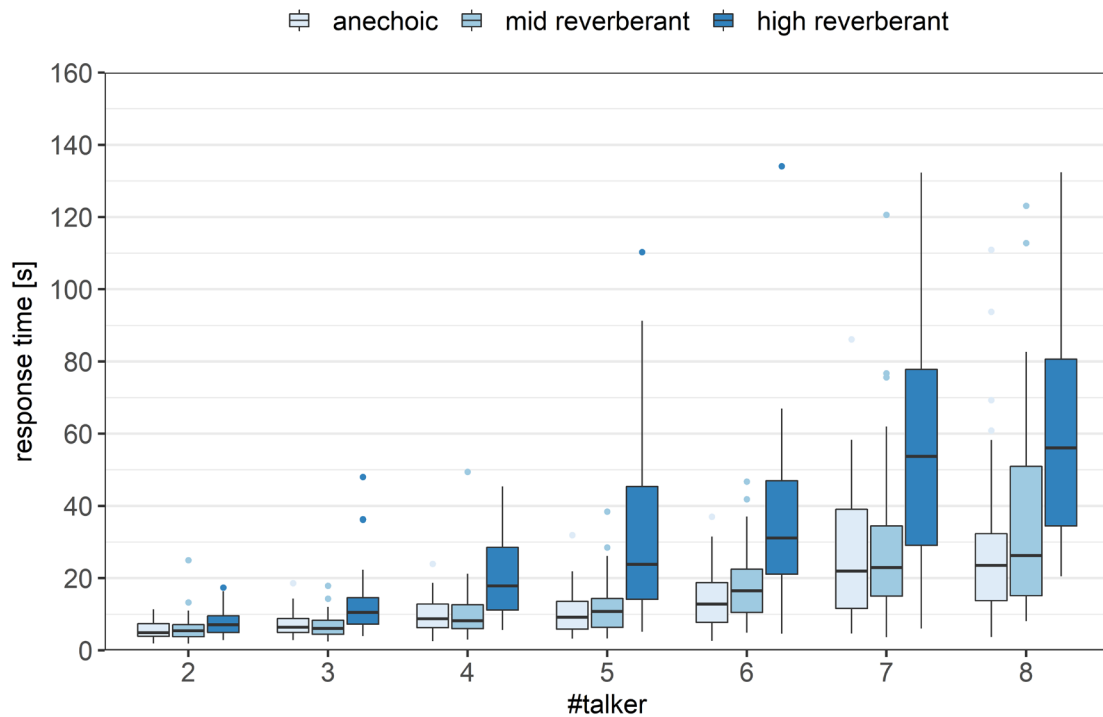

246

247 Figure 5: Response time with respect to the number of talkers in a scene of all correct responses.  
248 The colors indicate the room reverberation conditions. The boxes cover the range between the 25th  
249 and the 75th percentile. The horizontal line in the boxes indicates the median. The whiskers extend  
250 to 1.5 times the inter-quartile range. Outliers are indicated as dots.

251

252 In Figure 6 the localization error is shown. In the high-reverberation condition an increasing mean  
253 localization error was found for six and more talkers, with the eight-talker setting resulting in a  
254 median error of  $30^\circ$ , i.e., two potential positions error from the target location. In the anechoic and  
255 mid-reverberant conditions only few errors were found, indicated as outliers in Figure 6.

256

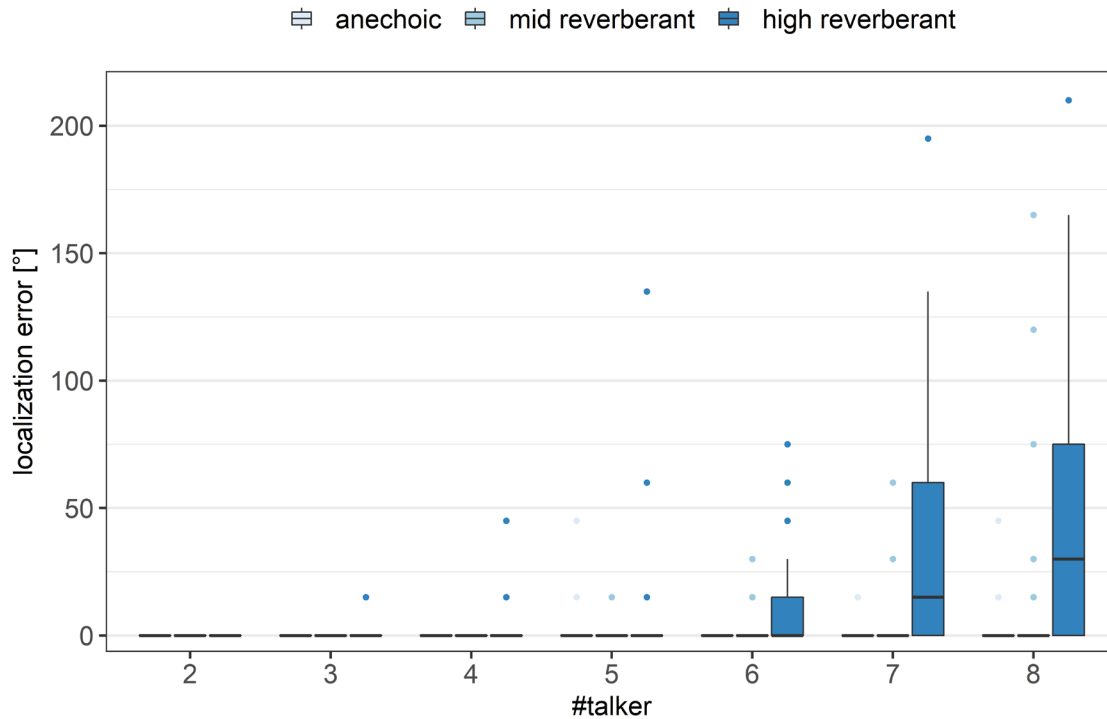

258 Figure 6: Localization error with respect to the number of talkers. The three colors indicate the  
259 room conditions. The boxes cover the range between the 25th and the 75th percentile. The  
260 horizontal line in the boxes indicates the median. The whiskers extend to 1.5 times the inter-  
261 quartile range. Outliers are indicated as dots.

262

## 263 B. Incoherent audio-visual room information

264

265 Figure 7 shows the percentage of correctly identified stories, comparing the coherent and the  
266 incoherent audio-visual conditions with and without reverberation. The light blue/grey bars  
267 indicate the acoustically anechoic conditions and the dark bars the acoustically reverberant  
268 conditions. No differences arise from the audio-visual incongruency.

269

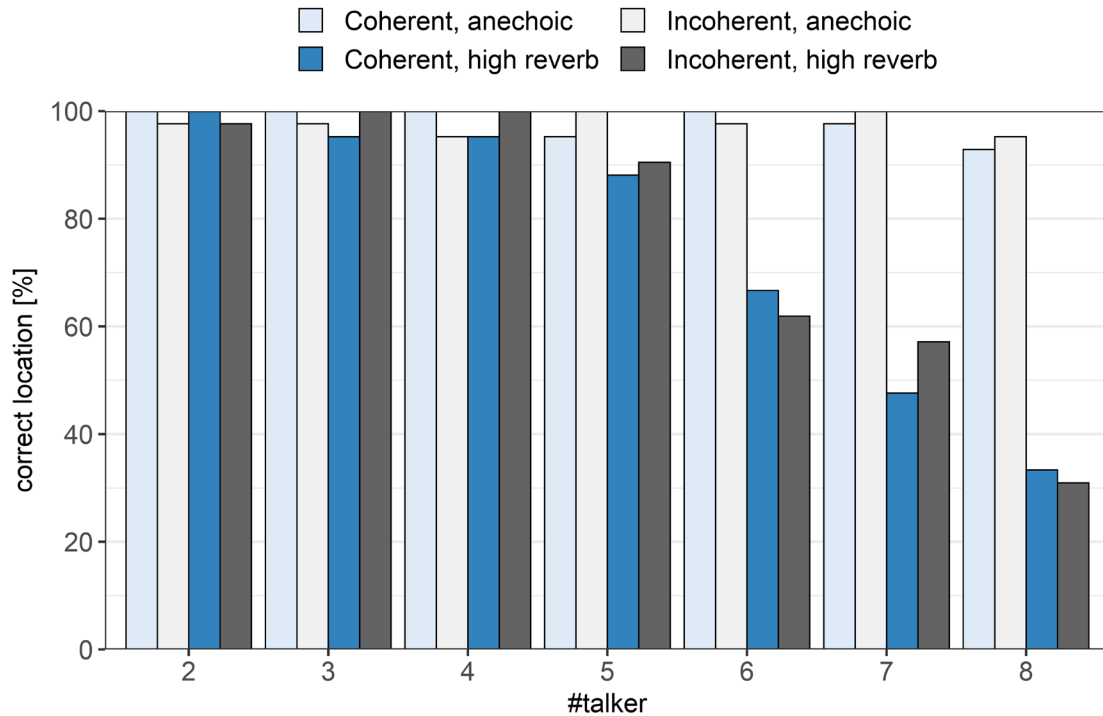

271 Figure 7: The percentage of correct response locations comparing the coherent and incoherent  
272 audio-visual conditions. Each bar contains 42 datapoints across subjects and repetitions. The three  
273 colors indicate the room conditions.

274

275 Figure 8 shows the response times for the incongruent audio-visual conditions (grey boxes), i.e.,  
276 the conditions with anechoic acoustic stimuli and the visuals of the reverberant room (light grey)  
277 and with high acoustic reverberation and the visuals of the anechoic room (dark grey).  
278 Additionally, the response times from the coherent anechoic and reverberant conditions are shown  
279 (blue boxes, as in Figure 5). No significant difference was found between the congruent and the  
280 incongruent condition [ $p > 0.12$ ].

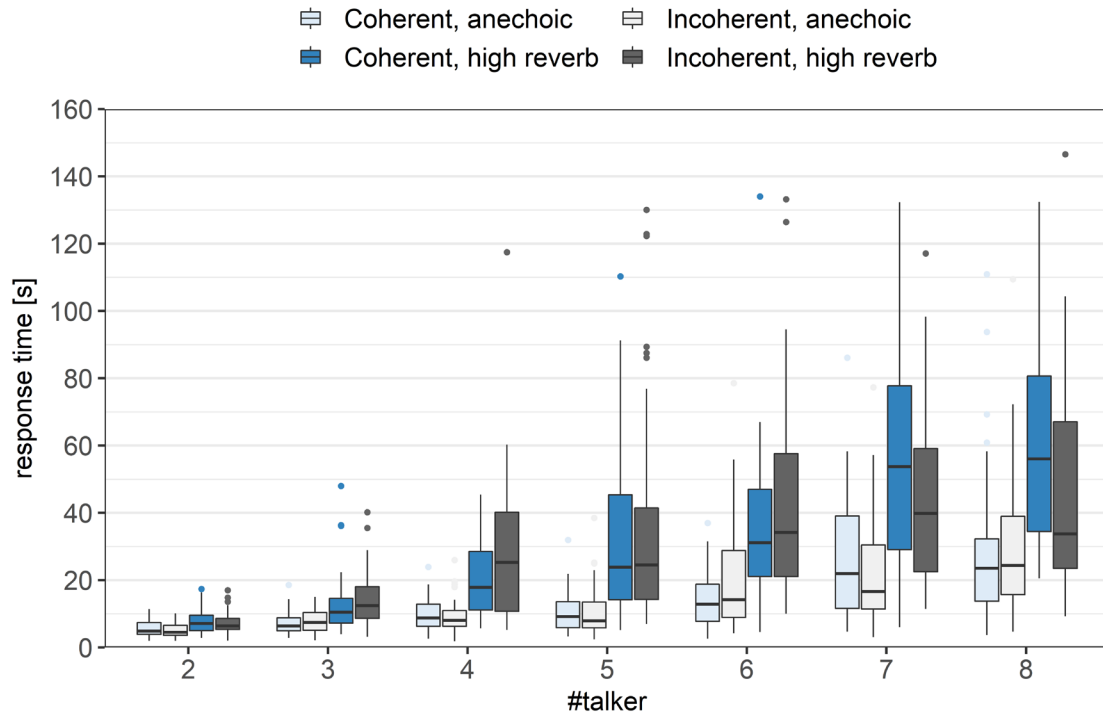

281

282 Figure 8: Response time with respect to the number of talkers in a scene. The light-blue and light-  
283 grey boxes indicate the anechoic room acoustic condition with coherent and incoherent visual  
284 information, respectively. The dark-blue and dark-grey boxes indicate the high reverberant room  
285 acoustic condition. The boxes cover the range between the 25th and the 75th percentile. The  
286 horizontal line in the boxes indicates the median. The whiskers extend to 1.5 times the inter-  
287 quartile range. Outliers are indicated as dots.

288

289

290

291

292

293

294

295



## 296 IV. Discussion

297

298 In the current study we investigated the ability of normal-hearing listeners to identify and locate a  
299 story in the presence of other stories. The task of the listeners was to locate a target story in the  
300 presence of a varying number of simultaneous interfering talkers. Furthermore, the effect of audio-  
301 visual room information was investigated, by testing different audio-visually coherent and  
302 incoherent reverberant environments. The data showed that the localization accuracy and the  
303 response time are affected by the number of simultaneous talkers as well as by reverberation. With  
304 an increase of number of interfering talkers and an increase of reverberation time the performance  
305 of the listeners decreased. Presenting incoherent audio-visual room information did not affect the  
306 outcome measures.

### 307 A. Effect of number of talkers

308 Several factors are likely to affect the increase in response time with increasing number of talkers.

309 In the present study the speech level of each talker was kept constant independent of the number  
310 of talkers, and therefore, the signal-to-noise ratio (SNR) decreases. Thus, the intelligibility is  
311 expected to drop with the number of simultaneous talkers. However, the effective SNR is  
312 constantly changing with head-motion and fluctuations in the signals (Grange & Culling, 2016).  
313 The head-motion introduces a variation of the target and interferer angles relative to the head and  
314 thus head-shadow and interaural time differences vary. Both head-shadow and interaural time  
315 differences have been shown to be utilized to separate target and interfering speech sources  
316 (Bronkhorst, 2000; Culling et al., 2004). Fluctuations in the speech signals allow for dip-listening  
317 which can significantly improve the SNR in some time-frequency bins. Such glimpses can help to  
318 better understand speech (Glyde et al., 2013; Miller & Licklider, 1950). When many speech  
319 sources are presented, such glimpses are usually reduced (Cooke, 2006; Freyman et al., 2004).

320 Another effect that likely influences the response time is the amount of informational masking,  
321 i.e., confusions between the target and the interferers (Carhart et al., 1969; Durlach et al., 2003;  
322 Kidd et al., 2008; Watson, 2005). Previous studies have argued that the amount of informational  
323 masking decreases with increasing number of simultaneous talkers (Carhart et al., 1975; Freyman  
324 et al., 2004; S. A. Simpson & Cooke, 2005). However, in the current study the target speaker needs  
325 to be identified by understanding the speech and to do so, listeners also need to understand the  
326 content of the interferers. Thus, the listener needs to employ a strategy to search through the  
327 auditory scene and while performing the search an interfering talker becomes a temporary target  
328 talker. Therefore, the definition of informational masking that was already controversial in classic  
329 speech perception tasks (Durlach et al., 2003; Kidd et al., 2008; Watson, 2005) becomes even more  
330 complex. How the listeners perform this task and which search strategies they employ, remains an  
331 open question and is out of the scope of the current study.

### 332 B. Effect of Reverberation

333 Reverberation was found to affect the response time only between the mid-reverberation and the  
334 high-reverberation conditions, and when there were four or more talker in a scene. In literature, it  
335 is reported that reverberation affects speech intelligibility more with few interfering talkers  
336 because potential speech gaps and pauses get ‘filled’ with the reverberant energy (Bolt &  
337 MacDonald, 1949; Xia et al., 2018). Such gaps generally do not exist with many overlapping  
338 speech sources (Cooke, 2006; Freyman et al., 2004). A potential explanation for the disagreement  
339 is that the task remains fairly easy with additional reverberation when few talkers are in a scene  
340 and thus, the effect of reverberation is masked.

341 No difference in response time was observed between the anechoic and the mid-reverberant  
342 conditions. The inexistent difference between the anechoic and the mid-reverberant condition  
343 contradicts results from previous studies where differences in speech perception between mildly

344 reverberant conditions and anechoic conditions were found (Ahrens, Marschall, et al., 2019;  
345 Duquesnoy & Plomp, 1980; Plomp, 1976). The reason for this discrepancy could be that the test  
346 paradigm might not be as sensitive to capture small differences in reverberation time, as traditional  
347 speech tests. However, (Kopčo et al., 2010) discussed a similar finding that mild reverberation  
348 does not affect the speech localization in background speech by comparing their study with data  
349 from (B. D. Simpson et al., 2006). This raises the question if there is an effect of mild reverberation  
350 on speech intelligibility in everyday situations or if this effect can only be observed in artificial  
351 listening scenarios in the laboratory.

352

### 353 C. Experimental paradigm

354 The spatial scene analysis method employed in this study was similar to (Weller et al., 2016). The  
355 most significant difference between the approaches is that in the current study the target speech  
356 stimulus needed to be understood while the task in (Weller et al., 2016) was to judge the gender  
357 of all talkers presented in a scene. Consequently, they used the total number of perceived talkers  
358 as their main outcome measure, while we used the response time. Furthermore, in their study the  
359 participants needed to translate the spatial percept from an egocentric auditory perception onto a  
360 top-down view interface. This translation was not needed in the current study as virtual reality was  
361 employed as a user interface.

362 While the use of virtual reality can allow for a more user-friendly interface, virtual reality could  
363 also introduce issues to an experiment. For example, the auditory percept might be affected by the  
364 physical presence of the headset which has been shown to be negligible for setups with far spaced  
365 sources (Ahrens, Lund, et al., 2019; Gupta et al., 2018). Furthermore, virtual reality glasses might  
366 alter the participant's behavior due to their physical appearance but also because the visual world

367 is not an exact copy of the real world. However, the influence is likely negligible in this  
368 experimental setup.

369 Contrary to classical speech perception studies where a %-correct or a reception threshold is  
370 determined, in the present study the response time was used as the main outcome measure.  
371 (Drullman & Bronkhorst, 2000) used a similar speech localization/identification paradigm with  
372 sentences and words instead of ongoing speech. They showed that the trend of change in  
373 intelligibility with increasing number of talkers was similar to the trend of the response times, i.e.,  
374 with more interfering talkers the intelligibility decreases, and the response time increases. While  
375 the material and the task were not fully comparable between these studies, one can expect a  
376 correlation between speech intelligibility and response time.

377

#### 378 D. Effect of incoherent AV

379 Visual information is known to affect speech perception (McGurk & MacDonald, 1976). However,  
380 the effect of visual room information on auditory perception remains unclear. Previous studies  
381 showed that visual information of the room can improve auditory distance perception (Calcagno  
382 et al., 2012) and incongruent audio-visual cues can disrupt distance or externalization percepts  
383 (Gil-Carvajal et al., 2016). However, visual information has been shown to not affect the percept  
384 of reverberation (Schutte et al., 2019), which is in line with the results from the current study.

385

#### 386 E. Limitations

387 The speech material (10 stories spoken by 10 talkers) was recorded specifically for this study with  
388 the aim to have distinctly different content that can be visualized with an icon. Furthermore, we  
389 aimed for natural speech as opposed to highly controlled recordings with professional speakers.  
390 This approach also comes with disadvantage; for example some stories or talkers might be easier

391 to understand than others. However, as stories and talkers were chosen randomly, their influence  
392 is likely to be little over the sufficiently large number of iterations.

393 One aim of this study was to develop a test paradigm that is more like real-life listening than most  
394 current speech intelligibility tests. While the task of understanding and locating a speech stream  
395 out of interfering speech is more similar to traditional speech tests, it is by no means a replications  
396 of a realistic cocktail-party situation. Firstly, all talkers are located at the same distance and with  
397 the same speech level and face the listener. This decision was made to not give any level,  
398 directional or direct-to-reverberant energy cues other than the information from the room  
399 reflections and the talkers themselves. Secondly, the visual avatars are highly conceptualized  
400 human bodies. Technology does not yet allow to visualize highly realistic human avatars with  
401 conventional computational power and effort. When using avatars that share similarities with real  
402 humans but evidently are not, viewers might get distracted (compare uncanny valley, (Diel et al.,  
403 2022)). Thirdly, lip-movements have not been included in this study. This choice was made  
404 because lip-movement simulations are not, as to the knowledge of the authors, evaluated for  
405 hearing research purposes. Additionally, the aim of the avatars was more to be a ‘response-box’  
406 than an actual simulation of a human talker.

407

## 408 V. Conclusions

409 In the present study we investigated the ability of listeners to analyze a spatial scene with multiple  
410 talkers. A varying number of simultaneously spoken stories was presented in different reverberant  
411 environments and listeners were asked to locate a target story. Results showed that the number of  
412 simultaneous talkers affected the correct identification as well as the response time. Reverberation

413 only affected the outcome measures when the reverberation time was high but not with moderate  
414 reverberation.

415

## 416 Acknowledgement

417 We would like to thank Marton Marschall, Valentina Zapata Rodriguez and Jakob Nygard  
418 Wincentz for their valuable feedback regarding the plausibility of the virtual audio-visual rooms  
419 and Torsten Dau for the feedback on the experimental design.

420

## 421 References

422

423 Ahrens, A., Lund, K. D. K. D., Marschall, M., & Dau, T. (2019). Sound source localization with  
424 varying amount of visual information in virtual reality. *PLOS ONE*, *14*(3), e0214603.  
425 <https://doi.org/10.1371/journal.pone.0214603>

426 Ahrens, A., Marschall, M., & Dau, T. (2019). Measuring and modeling speech intelligibility in  
427 real and loudspeaker-based virtual sound environments. *Hearing Research*, *377*, 307–317.  
428 <https://doi.org/10.1016/j.heares.2019.02.003>

429 Arweiler, I., & Buchholz, J. M. (2011). The influence of spectral characteristics of early reflections  
430 on speech intelligibility. *The Journal of the Acoustical Society of America*, *130*(2), 996–1005.  
431 <https://doi.org/10.1121/1.3609258>

432 Arweiler, I., Buchholz, J. M., & Dau, T. (2013). The influence of masker type on early reflection  
433 processing and speech intelligibility (L). *The Journal of the Acoustical Society of America*,  
434 *133*(1), 13–16. <https://doi.org/10.1121/1.4770249>

435 Berzborn, M., Bomhardt, R., Klein, J., Richter, J. G., & Vorländer, M. (2017). The ITA-Toolbox :  
436 An Open Source MATLAB Toolbox for Acoustic Measurements and Signal Processing.  
437 *Fortschritte Der Akustik*, 222–225. [http://www.ita-toolbox.org/publications/ITA-](http://www.ita-toolbox.org/publications/ITA-Toolbox_paper2017.pdf)  
438 [Toolbox\\_paper2017.pdf](http://www.ita-toolbox.org/publications/ITA-Toolbox_paper2017.pdf)

439 Best, V., Keidser, G., Buchholz, J. M., & Freeston, K. (2015). An examination of speech reception  
440 thresholds measured in a simulated reverberant cafeteria environment. *International Journal*  
441 *of Audiology*, *54*(10), 682–690. <https://doi.org/10.3109/14992027.2015.1028656>

442 Bolt, R. H., & MacDonald, A. D. (1949). Theory of Speech Masking by Reverberation. *The*  
443 *Journal of the Acoustical Society of America*, *21*(6), 577–580.  
444 <https://doi.org/10.1121/1.1906551>

- 445 Bronkhorst, A. W. (2000). The Cocktail Party Phenomenon: A Review of Research on Speech  
446 Intelligibility in Multiple-Talker Conditions. *Acta Acustica United with Acustica*, 86(1), 117–  
447 128.
- 448 Bronkhorst, A. W., & Plomp, R. (1990). A Clinical Test for the Assessment of Binaural Speech  
449 Perception in Noise. *International Journal of Audiology*, 29(5), 275–285.  
450 <https://doi.org/10.3109/00206099009072858>
- 451 Buchholz, J. M., & Best, V. (2020). Speech detection and localization in a reverberant multitalker  
452 environment by normal-hearing and hearing-impaired listeners. *The Journal of the Acoustical*  
453 *Society of America*, 147(3), 1469–1477. <https://doi.org/10.1121/10.0000844>
- 454 Calcagno, E. R., Abregú, E. L., Eguía, M. C., & Vergara, R. (2012). The role of vision in auditory  
455 distance perception. *Perception*, 41(2), 175–192. <https://doi.org/10.1068/p7153>
- 456 Carhart, R., Johnson, C., & Goodman, J. (1975). Perceptual masking of spondees by combinations  
457 of talkers. *The Journal of the Acoustical Society of America*, 58(S1), S35–S35.  
458 <https://doi.org/10.1121/1.2002082>
- 459 Carhart, R., Tillman, T. W., & Greetis, E. S. (1969). Perceptual Masking in Multiple Sound  
460 Backgrounds. *The Journal of the Acoustical Society of America*, 45(3), 694–703.  
461 <https://doi.org/10.1121/1.1911445>
- 462 Cherry, E. C. (1953). Some Experiments on the Recognition of Speech, with One and with Two  
463 Ears. *The Journal of the Acoustical Society of America*, 25(5), 975–979.  
464 <https://doi.org/10.1121/1.1907229>
- 465 Cooke, M. (2006). A glimpsing model of speech perception in noise. *The Journal of the Acoustical*  
466 *Society of America*, 119(3), 1562–1573. <https://doi.org/10.1121/1.2166600>
- 467 Culling, J. F., Hawley, M. L., & Litovsky, R. Y. (2004). The role of head-induced interaural time  
468 and level differences in the speech reception threshold for multiple interfering sound sources.  
469 *The Journal of the Acoustical Society of America*, 116(2), 1057–1065.  
470 <https://doi.org/10.1121/1.1772396>
- 471 Diel, A., Weigelt, S., & Macdorman, K. F. (2022). A meta-analysis of the uncanny valley’s  
472 independent and dependent variables. *ACM Transactions on Human–Robot Interaction*,  
473 11(1). <https://doi.org/10.1145/3470742>
- 474 Drullman, R., & Bronkhorst, A. W. (2000). Multichannel speech intelligibility and talker  
475 recognition using monaural, binaural, and three-dimensional auditory presentation. *The*  
476 *Journal of the Acoustical Society of America*, 107(4), 2224–2235.  
477 <https://doi.org/10.1121/1.428503>
- 478 Duquesnoy, A. J., & Plomp, R. (1980). Effect of reverberation and noise on the intelligibility of  
479 sentences in cases of presbycusis. *The Journal of the Acoustical Society of America*, 68(2),  
480 537–544. <https://doi.org/10.1121/1.384767>

- 481 Durlach, N. I., Mason, C. R., Kidd, G., Arbogast, T. L., Colburn, H. S., & Shinn-Cunningham, B.  
482 G. (2003). Note on informational masking (L). *The Journal of the Acoustical Society of*  
483 *America*, 113(6), 2984. <https://doi.org/10.1121/1.1570435>
- 484 Favrot, S., & Buchholz, J. M. (2010). LoRA: A loudspeaker-based room auralization system. *Acta*  
485 *Acustica United with Acustica*, 96(2), 364–375. <https://doi.org/10.3813/AAA.918285>
- 486 Freyman, R. L., Balakrishnan, U., & Helfer, K. S. (2004). Effect of number of masking talkers and  
487 auditory priming on informational masking in speech recognition. *The Journal of the*  
488 *Acoustical Society of America*, 115(5), 2246–2256. <https://doi.org/10.1121/1.1689343>
- 489 Gil-Carvajal, J. C., Cubick, J., Santurette, S., & Dau, T. (2016). Spatial Hearing with Incongruent  
490 Visual or Auditory Room Cues. *Scientific Reports*, 6. <https://doi.org/10.1038/srep37342>
- 491 Glyde, H., Buchholz, J., Dillon, H., Best, V., Hickson, L., & Cameron, S. (2013). The effect of  
492 better-ear glimpsing on spatial release from masking. *The Journal of the Acoustical Society*  
493 *of America*, 134(4), 2937–2945. <https://doi.org/10.1121/1.4817930>
- 494 Grange, J. A., & Culling, J. F. (2016). The benefit of head orientation to speech intelligibility in  
495 noise. *The Journal of the Acoustical Society of America*, 139(2), 703–712.  
496 <https://doi.org/10.1121/1.4941655>
- 497 Gupta, R., Ranjan, R., He, J., & Gan, W.-S. (2018). Investigation of effect of VR/AR headgear on  
498 Head related transfer functions for natural listening. *AES International Conference on Audio*  
499 *for Virtual and Augmented Reality*. <http://www.aes.org/e-lib/browse.cfm?elib=19697>
- 500 Hawley, M. L., Litovsky, R. Y., & Colburn, H. S. (1999). Speech intelligibility and localization in  
501 a multi-source environment. *The Journal of the Acoustical Society of America*, 105(6), 3436–  
502 3448. <https://doi.org/10.1121/1.424670>
- 503 Kidd, G., Mason, C. R., Richards, V. M., Gallun, F. J., & Durlach, N. I. (2008). Informational  
504 Masking. In W. A. Yost, A. N. Popper, & R. R. Fay (Eds.), *Auditory Perception of Sound*  
505 *Sources*. Springer Handbook of Auditory Research (Vol. 29, pp. 143–189).  
506 [https://doi.org/10.1007/978-0-387-71305-2\\_6](https://doi.org/10.1007/978-0-387-71305-2_6)
- 507 Kopčo, N., Best, V., & Carlile, S. (2010). Speech localization in a multitalker mixture. *The Journal*  
508 *of the Acoustical Society of America*, 127(3), 1450–1457. <https://doi.org/10.1121/1.3290996>
- 509 Kuznetsova, A., Brockhoff, P. B., & Christensen, R. H. B. (2017). lmerTest Package: Tests in  
510 Linear Mixed Effects Models. *Journal of Statistical Software*, 82(13).  
511 <https://doi.org/10.18637/jss.v082.i13>
- 512 Lenth, R. (2020). *emmeans: Estimated Marginal Means, aka Least-Squares Means*. [https://cran.r-](https://cran.r-project.org/package=emmeans)  
513 [project.org/package=emmeans](https://cran.r-project.org/package=emmeans)
- 514 Lund, K. D., Ahrens, A., & Dau, T. (2019). A method for evaluating audio-visual scene analysis  
515 in multi-talker environments. *Proceedings of the International Symposium on Auditory and*  
516 *Audiological Research, Vol. 7: Auditory Learning in Biological and Artificial Systems*.



- 517 McGurk, H., & MacDonald, J. (1976). Hearing lips and seeing voices. *Nature*, 264(5588), 746–  
518 748. <https://doi.org/10.1038/264746a0>
- 519 Miller, G. A., & Licklider, J. C. R. (1950). The Intelligibility of Interrupted Speech. *Journal of the*  
520 *Acoustical Society of America*, 22(2), 167–173. <https://doi.org/10.1121/1.1906584>
- 521 Moncur, J. P., & Dirks, D. (1967). Binaural and Monaural Speech Intelligibility in Reverberation.  
522 *Journal of Speech Language and Hearing Research*, 10(2), 186.  
523 <https://doi.org/10.1044/jshr.1002.186>
- 524 Nabelek, A. K., & Mason, D. (1981). Effect of Noise and Reverberation on Binaural and Monaural  
525 Word Identification by Subjects with Various Audiograms. *Journal of Speech, Language,*  
526 *and Hearing Research*, 24(3), 375–383. <https://doi.org/10.1044/jshr.2403.375>
- 527 Nábělek, A. K., & Pickett, J. M. (1974). Reception of consonants in a classroom as affected by  
528 monaural and binaural listening, noise, reverberation, and hearing aids. *The Journal of the*  
529 *Acoustical Society of America*, 56(2), 628–639. <https://doi.org/10.1121/1.1903301>
- 530 Plomp, R. (1976). Binaural and Monaural Speech Intelligibility of Connected Discourse in  
531 Reverberation as a Function of Azimuth of a Single Competing Sound Source (Speech or  
532 Noise). *Acta Acustica United with Acustica*, 34(4), 200–211.  
533 <http://www.ingentaconnect.com/content/dav/aaua/1976/00000034/00000004/art00004>
- 534 R Core Team. (2020). *R: A Language and Environment for Statistical Computing*. [https://www.r-](https://www.r-project.org/)  
535 [project.org/](https://www.r-project.org/)
- 536 Schutte, M., Ewert, S. D., & Wiegrebe, L. (2019). The percept of reverberation is not affected by  
537 visual room impression in virtual environments. *The Journal of the Acoustical Society of*  
538 *America*, 145(3). <https://doi.org/10.1121/1.5093642>
- 539 Simpson, B. D., Brungart, D. S., Iyer, N., Gilkey, R. H., & Hamil, J. T. (2006). DETECTION  
540 AND LOCALIZATION OF SPEECH IN THE PRESENCE OF COMPETING SPEECH  
541 SIGNALS. *Proceedings of the 12th International Conference on Auditory Display*.
- 542 Simpson, S. A., & Cooke, M. (2005). Consonant identification in N-talker babble is a  
543 nonmonotonic function of N. *The Journal of the Acoustical Society of America*, 118(5), 2775–  
544 2778. <https://doi.org/10.1121/1.2062650>
- 545 Warzybok, A., Rennie, J., Brand, T., Doclo, S., & Kollmeier, B. (2013). Effects of spatial and  
546 temporal integration of a single early reflection on speech intelligibility. *The Journal of the*  
547 *Acoustical Society of America*, 133(1), 269–282. <https://doi.org/10.1121/1.4768880>
- 548 Watson, C. S. (2005). Some Comments on Informational Masking. *Acta Acustica United with*  
549 *Acustica*, 91(2005), 502–512.
- 550 Weller, T., Best, V., Buchholz, J. M., & Young, T. (2016). A Method for Assessing Auditory  
551 Spatial Analysis in Reverberant Multitalker Environments. *Journal of the American Academy*  
552 *of Audiology*, 27(7), 601–611. <https://doi.org/10.3766/jaaa.15109>

553 Xia, J., Xu, B., Pentony, S., Xu, J., & Swaminathan, J. (2018). Effects of reverberation and noise  
554 on speech intelligibility in normal-hearing and aided hearing-impaired listeners. *The Journal*  
555 *of the Acoustical Society of America*, 143(3), 1523–1533. <https://doi.org/10.1121/1.5026788>  
556
